# Supplementary material for: Tuning the photochromism of indeno-fused 2H-naphthopyrans using steric spirocyclic groups
Source: Royal Society of Chemistry journal article supplement (doi:10.1039/d4nj02706j), 2024-01-01
Supplement: d4nj02706j1.pdf [file d4nj02706j1.pdf]

## *Supporting Information*

### **Tuning Photochromism of Indeno-Fused 2*H*-Naphthopyrans by Steric Spirocyclic Groups**

Ruiqi Wei<sup>1</sup>, Ruiyuan Zhou<sup>2</sup>, Ripei Shen,<sup>2</sup> Jie Han\*,<sup>1,2</sup>

<sup>1</sup>*College of Chemistry and Environmental Science, Kashi University, Kashi  
844008, P. R. China*

<sup>2</sup>*Key Laboratory of Advanced Energy Material Chemistry, College of Chemistry,  
Nankai University, 94 Weijin Road, Tianjin 300071, P. R. Chin*

### **CONTENTS:**

|                                                                 |            |
|-----------------------------------------------------------------|------------|
| <b>1. Synthesis of compounds NPs.....</b>                       | <b>S2</b>  |
| <b>2. NMR Spectra.....</b>                                      | <b>S7</b>  |
| <b>3. MS Spectra .....</b>                                      | <b>S16</b> |
| <b>4. Optical Properties of NPs in the solution .....</b>       | <b>S19</b> |
| <b>5. Optical Properties of PMMA Film Doped with NP-b .....</b> | <b>S21</b> |
| <b>6. X-ray Crystallographic Analysis .....</b>                 | <b>S22</b> |
| <b>7. References.....</b>                                       | <b>S22</b> |

## 1. Synthesis of compounds NPs

5-hydroxy-7*H*-benzo[*c*]fluoren-7-one (**1**) and 1,1-bis(4-methoxyphenyl)-2-propyn-1-ol were prepared according to the procedures in the literature.<sup>1,2</sup>

### Synthesis of 5-methoxy-benzofluoren-7(*H*)-one (**2**)

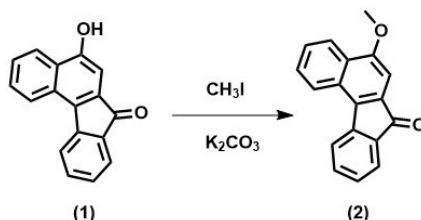

A mixture of 5-hydroxy-7*H*-benzo[*c*]fluoren-7-one (2.60 g, 10.65 mmol), K<sub>2</sub>CO<sub>3</sub> (5.84 g, 42.223 mmol) and CH<sub>3</sub>I (2.25 g, 15.84 mmol) in acetonitrile (30 mL) was stirred at room temperature for 4 h. The reaction mixture was poured into H<sub>2</sub>O (100 mL) and extracted with ethyl acetate (50 mL × 3). The organic extracts were combined, washed with brine and water, dried with anhydrous MgSO<sub>4</sub>, filtered, and the solvent was then removed under reduced pressure. The crude product was purified by silica gel column chromatography using petroleum ether/ethyl acetate (v/v = 20:1) as an eluent affording 5-methoxy-benzofluoren-7(*H*)-one (**2**) was obtained as a reddish-brown solid (2.43 g, 9.34 mmol) in 88% yield. m.p. 142.6 - 143.8 °C.

**<sup>1</sup>H NMR (400 MHz, Chloroform-*d*)** δ 8.32 (d, *J* = 8.3 Hz, 1H), 8.27 (d, *J* = 8.4 Hz, 1H), 7.80 (d, *J* = 7.5 Hz, 1H), 7.61 – 7.50 (m, 3H), 7.42 (t, *J* = 7.5 Hz, 1H), 7.18 (t, *J* = 7.4 Hz, 1H), 7.03 (s, 1H), 4.03 (s, 3H).

**<sup>13</sup>C NMR (101 MHz, Chloroform-*d*)** δ 194.84, 156.78, 145.52, 135.16, 134.50, 134.48, 132.47, 129.53, 129.28, 128.09, 127.46, 127.44, 124.49, 123.82, 123.72, 122.22, 98.05, 77.38, 77.06, 76.74, 55.91.

### Synthesis of 5-methoxy-7-(1,2,2-triphenylvinyl)-7*H*-benzo[*c*]fluoren-7-ol (**3**)

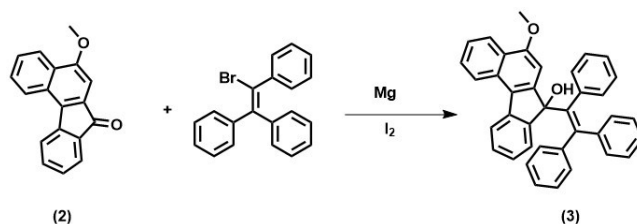

To a flame-dried 250 mL Schlenk flask, bromotriphenylethylene (1.90 g, 5.76 mmol), magnesium powder (158.74 mg, 6.53 mmol), small amounts of I<sub>2</sub> (9.75 mg, 38.42 μmol) and dry THF (80 mL) were added under argon atmosphere. The mixture was stirred for 5 hours at 60 °C, then cooled to 0 °C. Subsequently, 5-methoxy-benzofluoren-7(*H*)-one (**2**) (1.0 g, 3.84 mmol) was slowly added using a syringe and the mixture was heated to reflux. After allowing it to react overnight and cool to room temperature, a solution of ammonium chloride was added and the mixture was extracted with ethyl acetate (50 mL × 3). The organic extracts were combined and washed with brine and water, then dried with anhydrous MgSO<sub>4</sub>, filtered and the solvent was removed under reduced pressure. The crude product was purified by silica gel column chromatography using petroleum ether/ethyl acetate (v/v = 50:1) as an eluent affording 5-methoxy-7-(1,2,2-triphenylvinyl)-7*H*-benzo[*c*]fluoren-7-ol (**3**) as a pale-yellow solid (365 mg, 0.689 mmol) in 18% yield. m.p. 183.5 - 184.5 °C

**$^1\text{H}$  NMR (400 MHz,  $\text{DMSO}-d_6$ )**  $\delta$  8.32 – 8.22 (m, 2H), 7.78 – 7.74 (m, 1H), 7.74 – 7.70 (m, 1H), 7.61 – 7.56 (m, 1H), 7.53 – 7.47 (m, 1H), 7.30 – 7.22 (m, 5H), 7.05 (t,  $J = 7.4$  Hz, 2H), 7.00 – 6.95 (m, 1H), 6.94 – 6.85 (m, 4H), 6.84 – 6.79 (m, 1H), 6.65 – 6.59 (m, 1H), 6.54 (t,  $J = 7.2$  Hz, 2H), 6.44 (d,  $J = 7.4$  Hz, 2H), 5.42 (s, 1H).

**$^{13}\text{C}$  NMR (101 MHz,  $\text{DMSO}-d_6$ )**  $\delta$  155.86, 152.65, 151.16, 144.61, 143.16, 142.49, 141.76, 141.44, 140.59, 132.14, 129.73, 129.57, 128.59, 128.35, 127.71, 127.64, 127.25, 126.85, 126.70, 126.09, 126.05, 125.70, 125.66, 125.30, 125.17, 124.60, 124.16, 122.95, 122.04, 101.94, 82.94, 56.31, 40.64, 40.43, 40.22, 40.01, 39.80, 39.59, 39.38.

**HRMS (ESI)** calcd. for  $\text{C}_{38}\text{H}_{28}\text{O}_2$   $[\text{M}+\text{Na}]^+$  539.1982 ; found 539.1984.

#### Synthesis of 5-methoxy-2',3'-diphenylspiro[benzo[c]fluorene-7,1'-indene] (4)

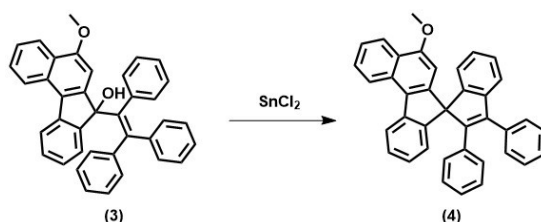

Under an argon atmosphere, anhydrous  $\text{SnCl}_2$  (175 mg, 0.39 mmol) was added into a solution of 5-methoxy-7-(1,2,2-triphenylvinyl)-7H-benzo[c]fluoren-7-ol (3) (0.46 mmol) in dry  $\text{CH}_2\text{Cl}_2$  (20 mL). The mixture was stirred for 3 h at room temperature. The reaction mixture was extracted by ethyl acetate twice (50 mL  $\times$  2). The organic extracts were combined, washed with brine and water, dried with anhydrous  $\text{MgSO}_4$ , filtered, and the solvent was then removed under reduced pressure. The crude product was purified by silica gel column chromatography using petroleum ether/ethyl acetate (v/v = 50:1) as an eluent affording 5-methoxy-2',3'-diphenylspiro[benzo[c]fluorene-7,1'-indene] (4) was obtained as a pale-yellow solid (144 mg, 0.29 mmol) in 85% yield. m.p. 186.5 - 187.5  $^\circ\text{C}$

**$^1\text{H}$  NMR (400 MHz,  $\text{Chloroform}-d$ )**  $\delta$  8.71 (d,  $J = 8.4$  Hz, 1H), 8.34 (dd,  $J = 8.4, 1.3$  Hz, 1H), 8.25 (d,  $J = 7.8$  Hz, 1H), 7.73 – 7.64 (m, 1H), 7.57 – 7.49 (m, 3H), 7.48 – 7.32 (m, 5H), 7.30 – 7.22 (m, 1H), 7.15 – 7.05 (m, 2H), 7.03 – 6.97 (m, 1H), 6.88 – 6.81 (m, 1H), 6.79 – 6.71 (m, 2H), 6.67 – 6.58 (m, 3H), 6.47 (s, 1H), 3.82 (s, 3H).

**$^{13}\text{C}$  NMR (101 MHz,  $\text{Chloroform}-d$ )**  $\delta$  156.18, 148.56, 146.27, 145.90, 145.52, 145.49, 143.65, 143.41, 135.54, 134.98, 130.41, 129.92, 129.78, 128.75, 128.68, 127.86, 127.69, 127.66, 127.38, 127.22, 126.93, 126.48, 126.15, 125.76, 124.88, 123.66, 123.35, 123.26, 122.55, 122.11, 120.82, 99.89, 77.44, 77.33, 77.13, 76.81, 70.86, 55.79.

**HRMS (ESI)** calcd. for  $\text{C}_{38}\text{H}_{28}\text{O}_2$   $[\text{M}+\text{Na}]^+$  521.1876; found 521.1878

#### Synthesis of 2',3'-diphenylspiro[benzo[c]fluorene-7,1'-inden]-5-ol (5)

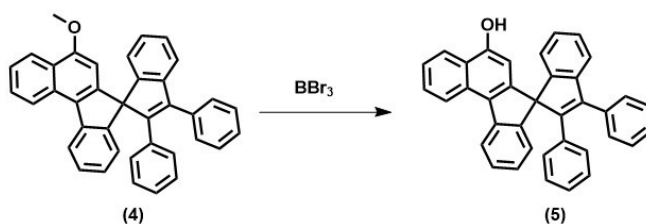

Under an argon atmosphere, 30 mL of dry dichloroethane was added to a dry Schlenk flask (100 mL), followed by the appropriate stoichiometric amount of 5-methoxy-2',3'-diphenylspiro[benzo[c]fluorene-7,1'-indene] (4) (260 mg, 0.52 mmol). A solution of boron

tribromide (653 mg, 2.16 mmol) was then added in an ice bath. The reaction was allowed to proceed for 5 hours at room temperature, followed by the addition of water at 0 °C. The reaction mixture was extracted by ethyl acetate twice (50 mL × 2). The organic extracts were combined, washed with brine and water, dried with anhydrous MgSO<sub>4</sub>, filtered, and the solvent was then removed under reduced pressure. The crude product was purified by silica gel column chromatography using petroleum ether/ethyl acetate (v/v = 50:1) as an eluent affording 2',3'-diphenylspiro[benzo[c]fluorene-7,1'-inden]-5-ol (**5**) was obtained as a white solid (220 mg, 0.29 mmol) in 87% yield. m.p. 197.5 - 198.6 °C

**<sup>1</sup>H NMR (400 MHz, Chloroform-*d*)** δ 8.77 (d, *J* = 8.5 Hz, 1H), 8.30 (d, *J* = 8.2 Hz, 2H), 7.72 (t, *J* = 7.7 Hz, 1H), 7.60 – 7.53 (m, 3H), 7.51 – 7.37 (m, 5H), 7.32 – 7.27 (m, 1H), 7.19 – 7.11 (m, 2H), 7.06 – 6.99 (m, 1H), 6.90 – 6.84 (m, 1H), 6.83 – 6.76 (m, 2H), 6.72 – 6.59 (m, 3H), 6.51 (s, 1H).

**<sup>13</sup>C NMR (101 MHz, Chloroform-*d*)** δ 152.02, 148.49, 146.03, 145.48, 145.22, 143.56, 143.42, 135.51, 134.84, 130.60, 130.30, 129.70, 128.77, 128.65, 127.90, 127.69, 127.64, 127.45, 127.26, 126.94, 126.45, 125.88, 124.87, 123.80, 123.39, 123.11, 122.52, 122.10, 120.77, 104.57, 77.42, 77.10, 76.78, 70.45.

**HRMS (ESI)** calcd. for C<sub>37</sub>H<sub>24</sub>O [M+Na]<sup>+</sup> 507.1719; found 507.1723

**The synthesis of compounds NP-a:**

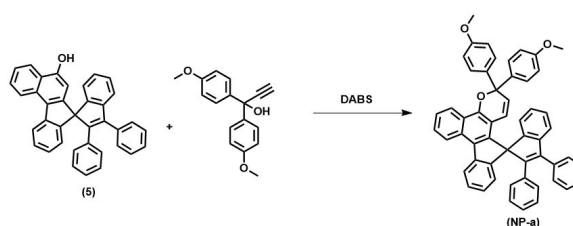

A solution of 2',3'-diphenylspiro[benzo[c]fluorene-7,1'-inden]-5-ol (**5**) (3.8 mmol), 1,1-diphenylprop-2-yn-1-ol **5a** (0.11 g, 0.52 mmol), and two drops of dodecylbenzenesulphonic acid in dry toluene (8 mL) was stirred at 40 °C for 3 h. After cooling down to room temperature, the reaction mixture was extracted by ethyl acetate twice (50 mL × 2). The organic extracts were combined, washed with brine and water, dried with anhydrous MgSO<sub>4</sub>, filtered, and the solvent was then removed under reduced pressure. The crude product was purified by silica gel column chromatography using petroleum ether/ethyl acetate (v/v = 50:1) as an eluent affording **NP-a** as a pale-yellow solid in 43%. m.p. 183.5 - 184.6 °C

**<sup>1</sup>H NMR (400 MHz, Chloroform-*d*)** δ 8.70 (d, *J* = 8.5 Hz, 1H), 8.46 (d, *J* = 8.4 Hz, 1H), 8.24 (d, *J* = 7.8 Hz, 1H), 7.65 (t, *J* = 7.6 Hz, 1H), 7.56 (d, *J* = 7.2 Hz, 4H), 7.48 (t, *J* = 7.4 Hz, 2H), 7.44 – 7.28 (m, 8H), 7.17 – 7.07 (m, 3H), 6.90 (t, *J* = 7.4 Hz, 1H), 6.83 (d, *J* = 8.5 Hz, 2H), 6.78 – 6.68 (m, 5H), 6.59 (d, *J* = 7.7 Hz, 2H), 6.43 (d, *J* = 9.8 Hz, 1H), 5.91 (d, *J* = 9.8 Hz, 1H), 3.80 (s, 3H), 3.75 (s, 3H).

**<sup>13</sup>C NMR (101 MHz, Chloroform-*d*)** δ 157.72, 147.05, 146.75, 145.40, 145.25, 144.07, 142.05, 141.66, 138.89, 136.00, 135.22, 134.36, 133.68, 129.72, 128.84, 128.44, 127.99, 127.65, 127.63, 127.29, 127.26, 126.61, 126.55, 126.48, 126.24, 126.01, 125.71, 125.51, 124.75, 124.52, 124.00, 122.68, 122.27, 121.56, 121.36, 121.18, 120.04, 119.07, 113.13, 112.30, 81.38, 69.31, 54.17, 54.09.

**HRMS (ESI)** calcd. for C<sub>52</sub>H<sub>34</sub>O<sub>3</sub> [M+Na]<sup>+</sup> 757.2713; found 757.2718.

**Synthesis of 5-methoxyspiro[benzo[c]fluorene-7,13'-indeno[1,2-l]phenanthrene] (**6**)**

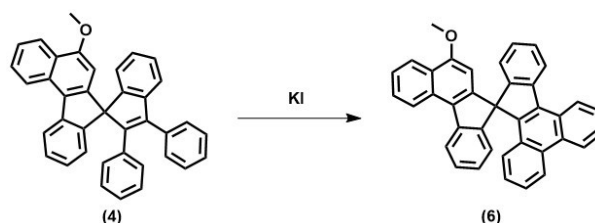

To a flame-dried 50 mL round-bottom flask, Potassium iodide (4.10 mmol) and 5-methoxy-2',3'-diphenylspiro[benzo[c]fluorene-7,1'-indene] (4) (0.802 mmol) and cyclohexane (20 mL) were added under air atmosphere. The solution was irradiated with a UV lamp (365 nm, 500 mW) for 4 hours. The crude product was purified by silica gel column chromatography using petroleum ether/ethyl acetate (v/v = 50 : 1) as an eluent affording 5-methoxyspiro[benzo[c]fluorene-7,13'-indeno[1,2-l]phenanthrene] as a pale-yellow solid (310 mg, 0.623 mmol) in 77% yield. m.p. 226.5 - 227.5 °C

**<sup>1</sup>H NMR (400 MHz, Chloroform-*d*)**  $\delta$  9.13 (d, *J* = 8.2 Hz, 1H), 8.94 (d, *J* = 8.5 Hz, 1H), 8.89 (d, *J* = 8.3 Hz, 1H), 8.70 (d, *J* = 8.4 Hz, 1H), 8.56 (d, *J* = 7.9 Hz, 1H), 8.50 (d, *J* = 7.9 Hz, 1H), 8.37 (d, *J* = 8.4 Hz, 1H), 7.89 (t, *J* = 7.5 Hz, 1H), 7.81 (t, *J* = 7.8 Hz, 2H), 7.59 (t, *J* = 7.6 Hz, 1H), 7.51 – 7.40 (m, 3H), 7.15 – 7.06 (m, 2H), 7.01 (t, *J* = 7.5 Hz, 1H), 6.93 (d, *J* = 8.2 Hz, 1H), 6.78 – 6.67 (m, 2H), 6.13 (s, 1H), 3.58 (s, 3H).

**<sup>13</sup>C NMR (101 MHz, Chloroform-*d*)**  $\delta$  156.32, 150.51, 148.76, 148.63, 142.97, 142.33, 141.65, 136.90, 131.86, 130.71, 130.57, 129.00, 128.94, 128.42, 127.90, 127.56, 127.47, 127.19, 127.10, 126.95, 126.54, 126.26, 126.19, 125.97, 125.04, 124.90, 124.75, 123.76, 123.73, 123.49, 123.31, 123.22, 123.13, 122.90, 122.38, 99.89, 77.37, 77.26, 77.06, 76.74, 67.22, 55.61.

**HRMS (ESI)** calcd. for C<sub>52</sub>H<sub>34</sub>O<sub>3</sub> [M+Na]<sup>+</sup> 757.2713; found 757.2718.

#### Synthesis of spiro[benzo[c]fluorene-7,13'-indeno[1,2-l]phenanthren]-5-ol (7)

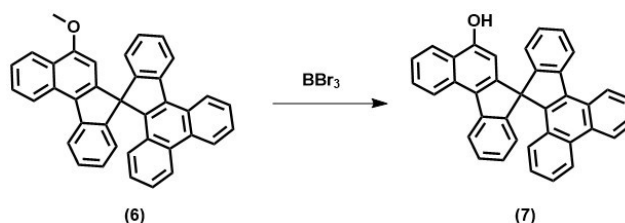

5-methoxyspiro[benzo[c]fluorene-7,13'-indeno[1,2-l]phenanthrene] (6) (260 mg, 0.52 mmol) and boron tribromide (653 mg, 2.16 mmol) were combined in a 50 mL round-bottom flask and dissolved in dry dichloroethane (20 mL) under an argon atmosphere. The reaction was allowed to proceed for 5 hours at room temperature, followed by the addition of water at 0°C. The organic phase was combined and washed with brine and water, then dried with anhydrous MgSO<sub>4</sub>, filtered and the solvent was removed under reduced pressure. The crude product was purified by silica gel column chromatography using petroleum ether/ethyl acetate (v/v = 50 : 1) as an eluent affording spiro[benzo[c]fluorene-7,13'-indeno[1,2-l]phenanthren]-5-ol (7) as a pale-yellow solid (185 mg, 0.38 mmol) in 73% yield. m.p. 197.5 - 198.6 °C

**<sup>1</sup>H NMR (400 MHz, Chloroform-*d*)**  $\delta$  9.09 (d, *J* = 8.2 Hz, 1H), 8.93 (d, *J* = 8.6 Hz, 1H), 8.86 (d, *J* = 8.3 Hz, 1H), 8.69 (d, *J* = 8.4 Hz, 1H), 8.53 (d, *J* = 7.9 Hz, 1H), 8.49 (d, *J* = 7.9 Hz, 1H), 8.28 (d, *J* = 8.4 Hz, 1H), 7.87 (t, *J* = 7.6 Hz, 1H), 7.83 – 7.75 (m, 2H), 7.58 (t, *J* = 7.7 Hz, 1H), 7.54 – 7.40 (m, 3H), 7.15 – 6.99 (m, 3H), 6.89 (d, *J* = 8.2 Hz, 1H), 6.75 (d, *J* = 7.5 Hz, 1H), 6.70 (d, *J* = 7.6 Hz, 1H), 6.11 (s, 1H).

**<sup>13</sup>C NMR (101 MHz, Chloroform-*d*)**  $\delta$  156.32, 150.51, 148.76, 148.63, 142.97, 142.33, 141.65, 136.90, 131.86, 130.71, 130.57, 129.00, 128.94, 128.42, 127.90, 127.56, 127.47, 127.19, 127.10, 126.95, 126.54, 126.26, 126.19, 125.97, 125.04, 124.90, 124.75, 123.76, 123.73, 123.49, 123.31, 123.22, 123.13, 122.90, 122.38, 99.89, 77.37, 77.26, 77.06, 76.74, 67.22, 55.61.

**HRMS (ESI)** calcd. for C<sub>37</sub>H<sub>22</sub>O [M+H]<sup>+</sup> 483.1743; found 483.1705.

#### Compound NP-b

This compound was prepared according to the same procedure as that of **NP-b**, except that the eluent for column chromatography is petroleum ether/ethyl acetate (v/v = 50 : 1) as an eluent. The product **NP-b** is a pale-yellow solid in 46% yield. m.p. 179.5 - 180.6 °C.

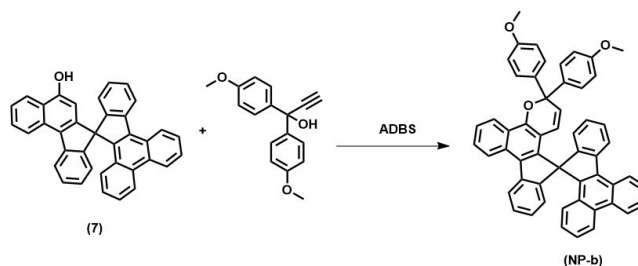

**<sup>1</sup>H NMR (400 MHz, Chloroform-*d*)**  $\delta$  9.44 (d, *J* = 8.0 Hz, 1H), 9.06 (d, *J* = 8.2 Hz, 1H), 8.91 (d, *J* = 8.6 Hz, 1H), 8.84 (d, *J* = 8.3 Hz, 1H), 8.66 (d, *J* = 8.3 Hz, 1H), 8.52 – 8.45 (m, 2H), 8.27 (d, *J* = 8.4 Hz, 1H), 7.87 – 7.81 (m, 1H), 7.81 – 7.74 (m, 2H), 7.56 (t, *J* = 7.8 Hz, 1H), 7.49 – 7.44 (m, 2H), 7.42 – 7.38 (m, 2H), 7.28 (d, *J* = 8.5 Hz, 1H), 7.20 (s, 1H), 7.09 – 7.04 (m, 2H), 7.02 – 6.98 (m, 1H), 6.93 (d, *J* = 8.3 Hz, 2H), 6.89 – 6.85 (m, 3H), 6.72 (d, *J* = 7.8 Hz, 1H), 6.67 (d, *J* = 7.6 Hz, 1H), 6.46 (d, *J* = 8.0 Hz, 1H), 6.09 (s, 1H), 3.85 (s, 3H), 3.81 (s, 3H).

**<sup>13</sup>C NMR (101 MHz, Chloroform-*d*)**  $\delta$  193.78, 162.24, 161.70, 160.79, 152.27, 150.38, 148.62, 148.50, 142.96, 142.28, 141.46, 136.81, 132.49, 132.44, 131.79, 130.79, 130.68, 130.60, 129.31, 129.20, 128.90, 128.38, 128.29, 128.11, 127.98, 127.62, 127.55, 127.19, 127.14, 126.93, 126.57, 126.29, 126.09, 125.43, 124.99, 124.96, 124.85, 124.82, 124.68, 123.85, 123.75, 123.48, 123.34, 123.22, 123.11, 122.94, 122.39, 77.38, 77.06, 76.75, 66.86, 55.45, 55.43.

**HRMS (ESI)** Calcd. for C<sub>54</sub>H<sub>36</sub>O<sub>3</sub> [M+H]<sup>+</sup> 733.2738; found 733.2719.

## 2. NMR Spectra

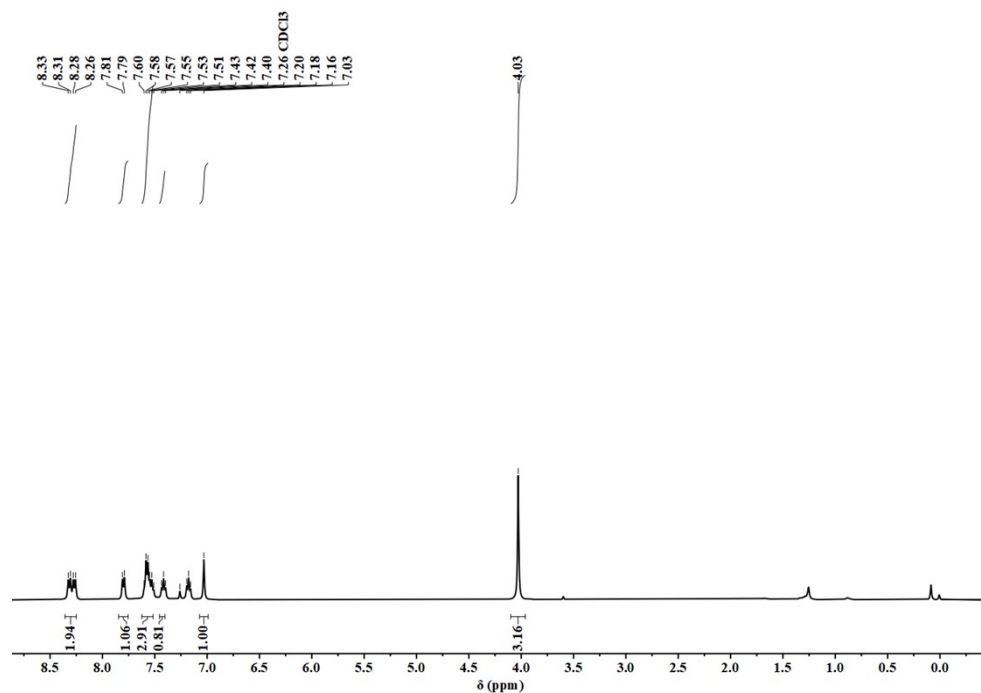

Fig. S1 <sup>1</sup>H NMR spectrum (400 MHz, CDCl<sub>3</sub>, 298 K) of 5-methoxy-benzofluoren-7(*H*)-one

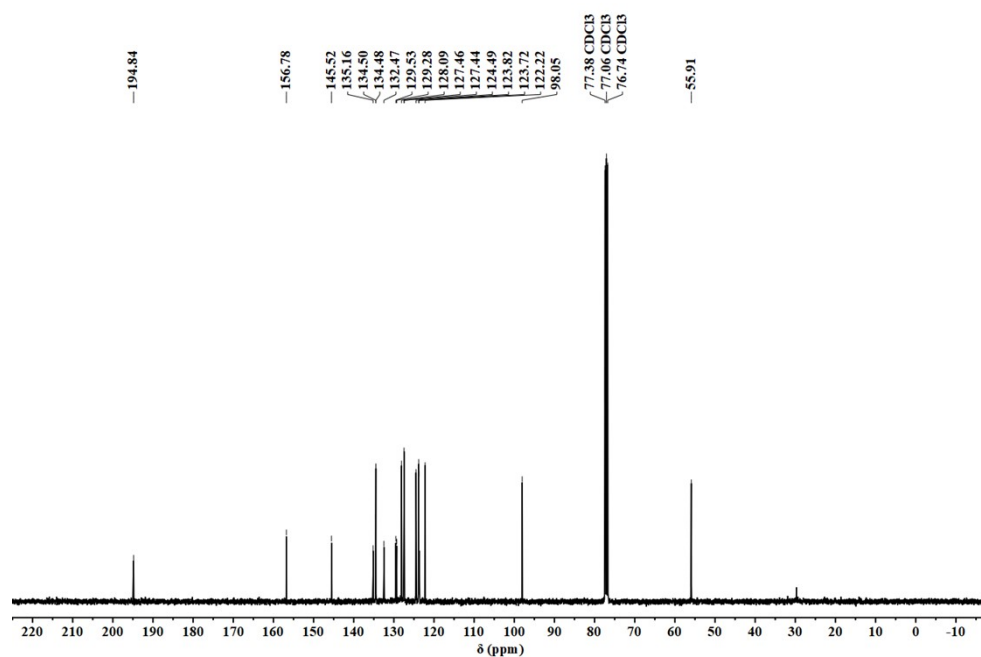

Fig. S2 <sup>13</sup>C NMR spectrum (101 MHz, CDCl<sub>3</sub>, 298 K) of 5-methoxy-benzofluoren-7(*H*)-one.

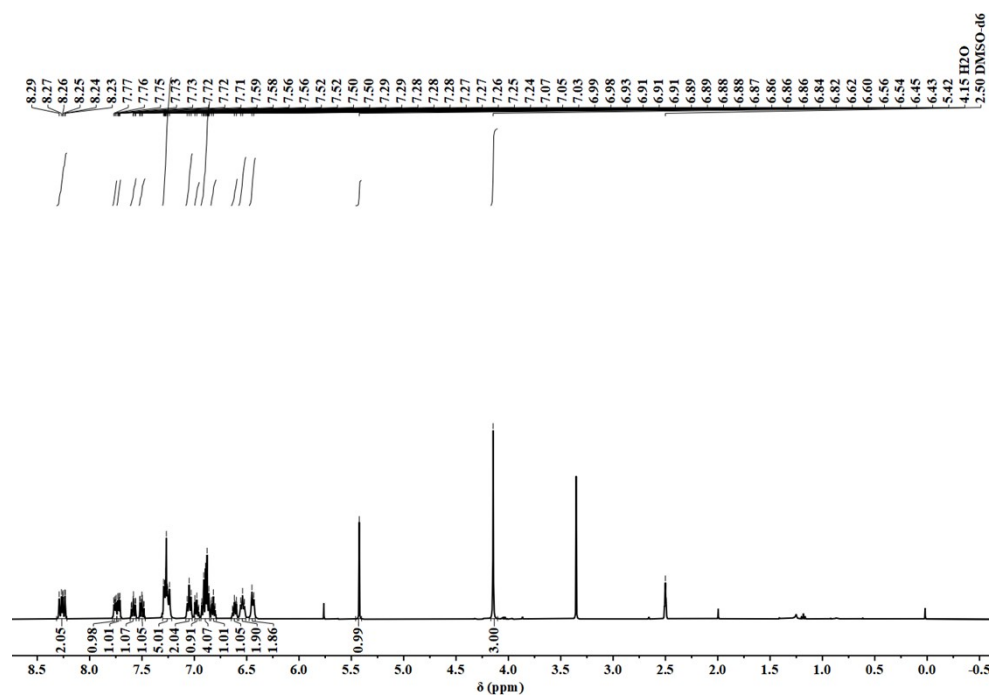

**Fig. S3**  $^1\text{H}$  NMR spectrum (400 MHz,  $\text{DMSO-}d_6$ , 298 K) of 5-methoxy-7-(1,2,2-triphenylvinyl)-7H-benzo[c]fluoren-7-ol

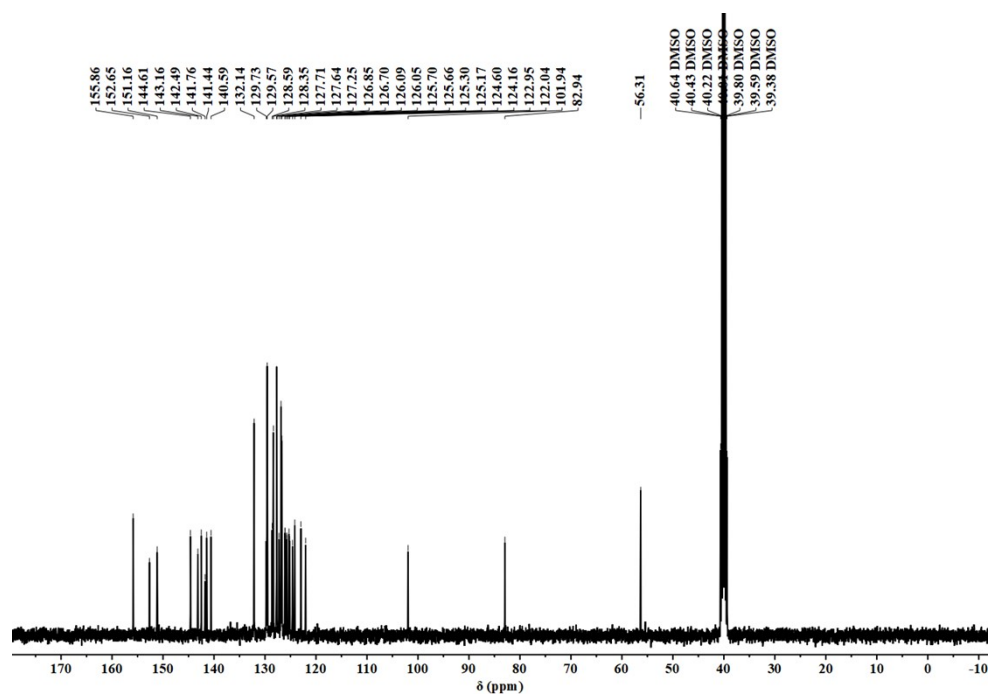

**Fig. S4**  $^{13}\text{C}$  NMR spectrum (101 MHz,  $\text{DMSO-}d_6$ , 298 K) of 5-methoxy-7-(1,2,2-triphenylvinyl)-7H-benzo[c]fluoren-7-ol

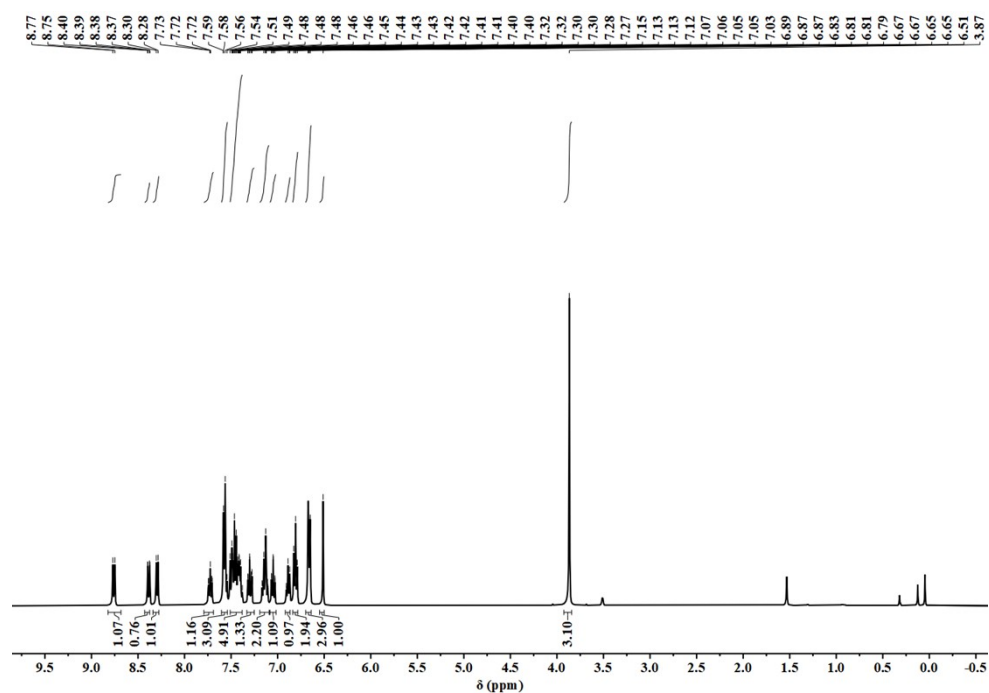

**Fig. S5**  $^1\text{H}$  NMR spectrum (400 MHz,  $\text{CDCl}_3$ , 298 K) of 5-methoxy-2',3'-diphenylspiro[benzo[c]fluorene-7,1'-indene]

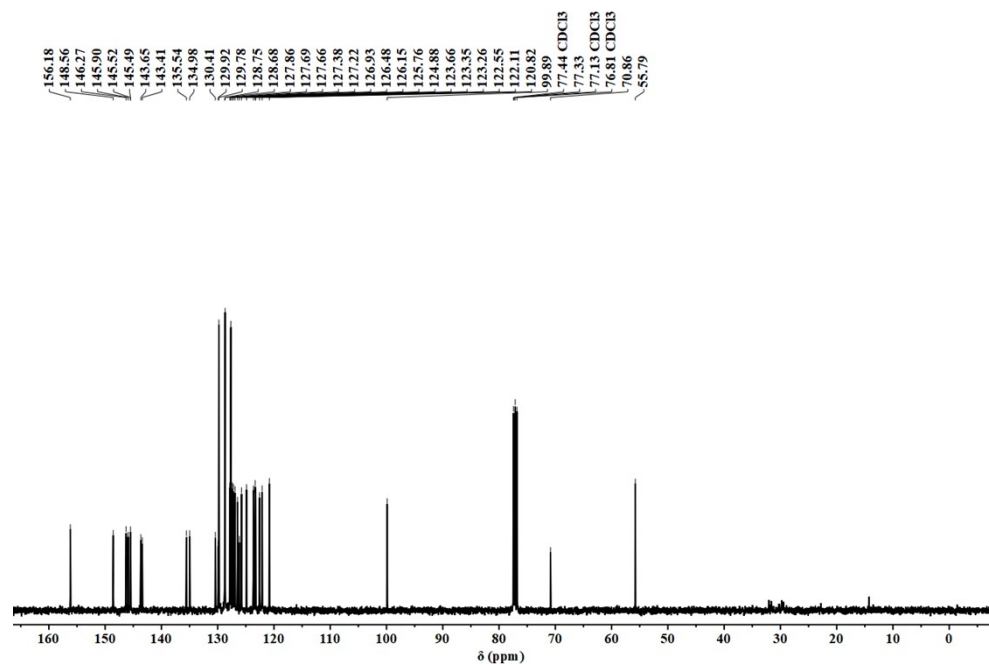

**Fig. S6**  $^{13}\text{C}$  NMR spectrum (101 MHz,  $\text{CDCl}_3$ , 298 K) of 5-methoxy-2',3'-diphenylspiro[benzo[c]fluorene-7,1'-indene]

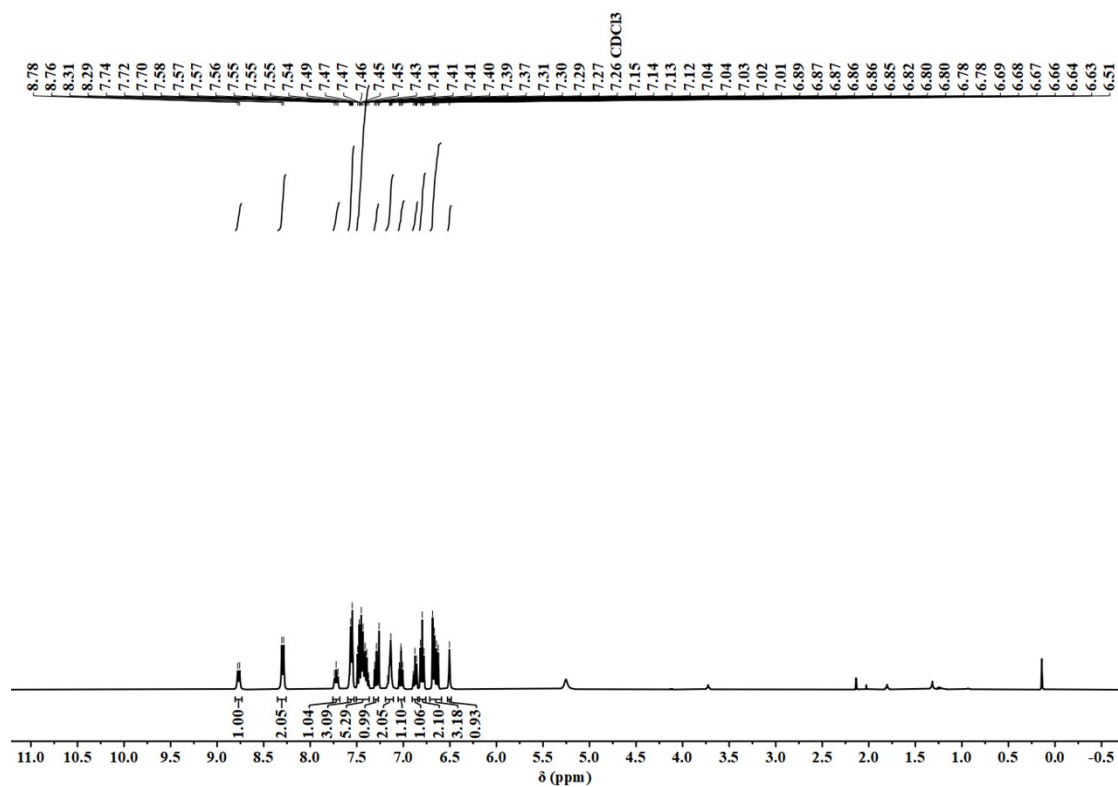

**Fig. S7** <sup>1</sup>H NMR spectrum (400 MHz, CDCl<sub>3</sub>, 298 K) of 2',3'-diphenylspiro[benzo[c]fluorene-7,1'-inden]-5-ol

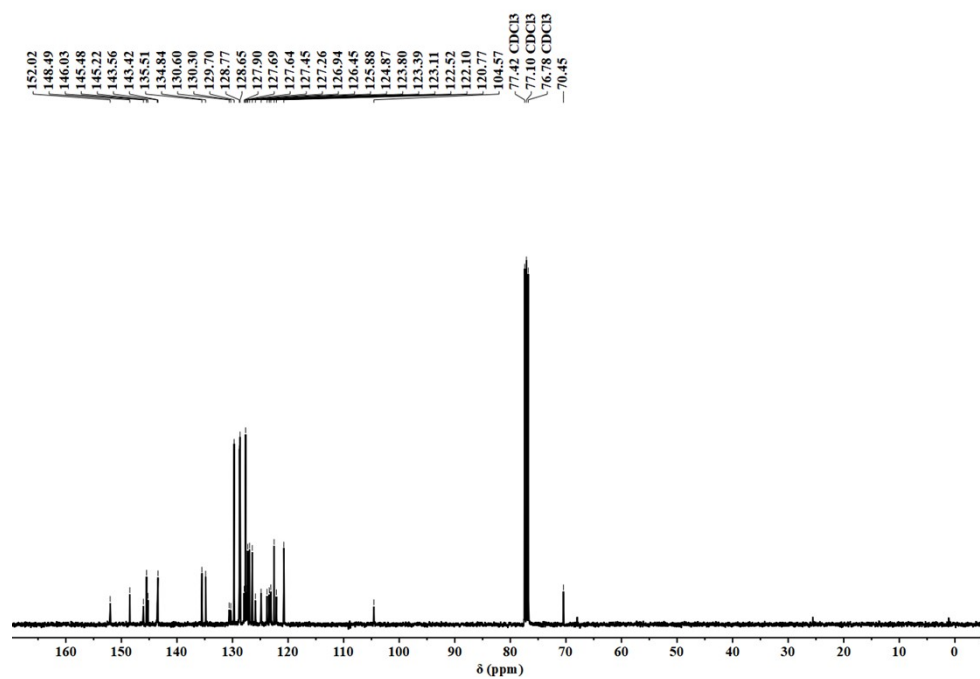

**Fig. S8** <sup>13</sup>C NMR spectrum (101 MHz, CDCl<sub>3</sub>, 298 K) of 2',3'-diphenylspiro[benzo[c]fluorene-7,1'-inden]-5-ol

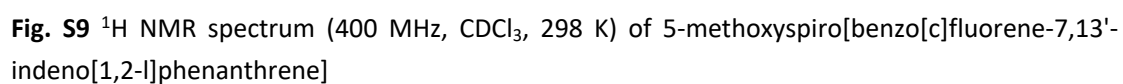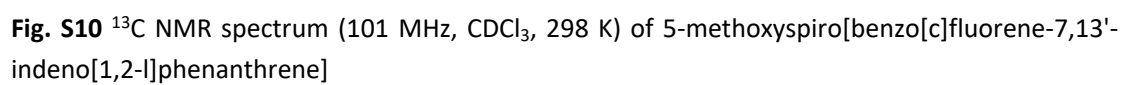

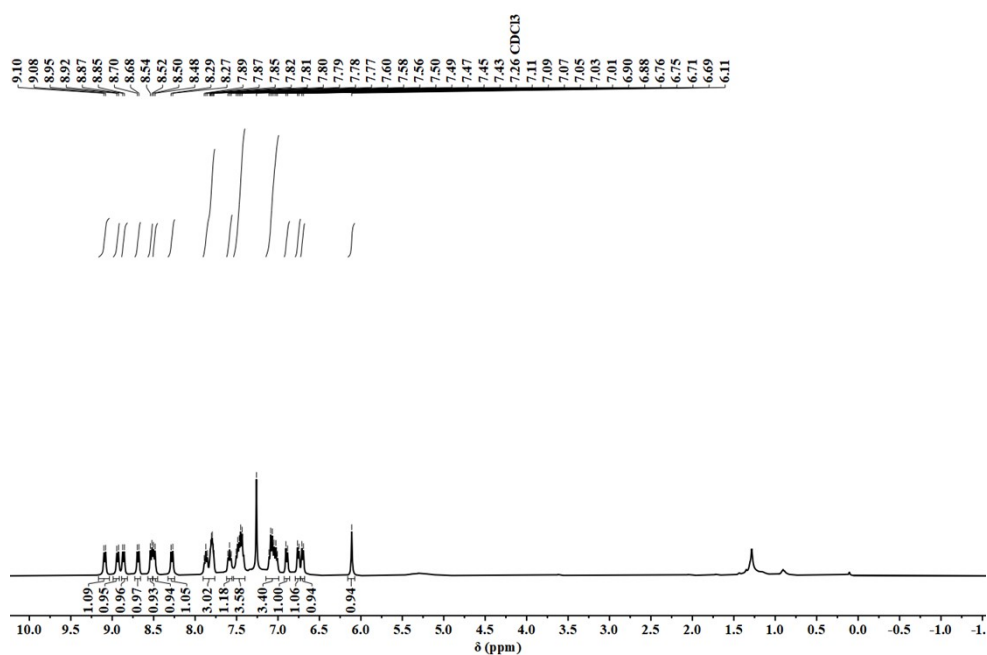

**Fig. S11**  $^1\text{H}$  NMR spectrum (400 MHz,  $\text{CDCl}_3$ , 298 K) of spiro[benzo[c]fluorene-7,13'-indeno[1,2-l]phenanthren]-5-ol

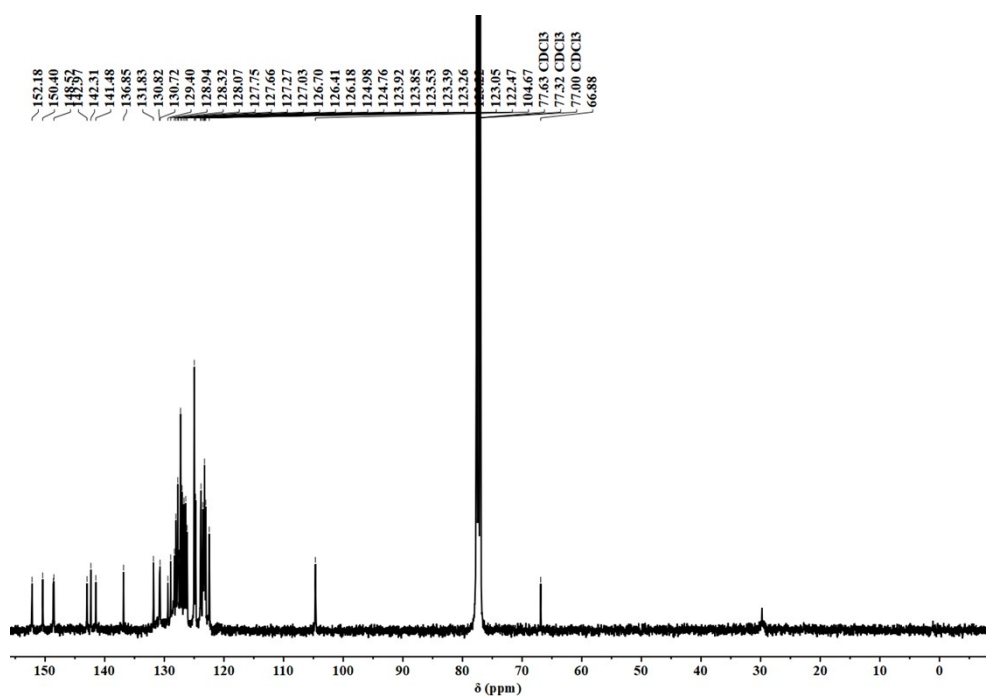

**Fig. S12**  $^{13}\text{C}$  NMR spectrum (101 MHz,  $\text{CDCl}_3$ , 298 K) of spiro[benzo[c]fluorene-7,13'-indeno[1,2-l]phenanthren]-5-ol

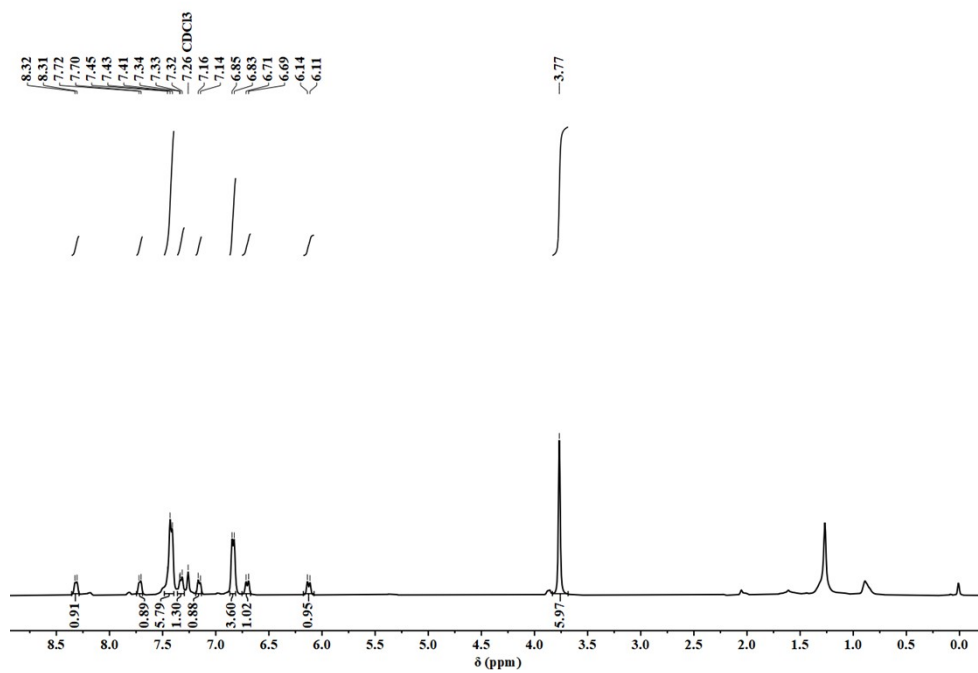

**Fig. S13** <sup>1</sup>H NMR spectrum (400 MHz, CDCl<sub>3</sub>, 298 K) of NP

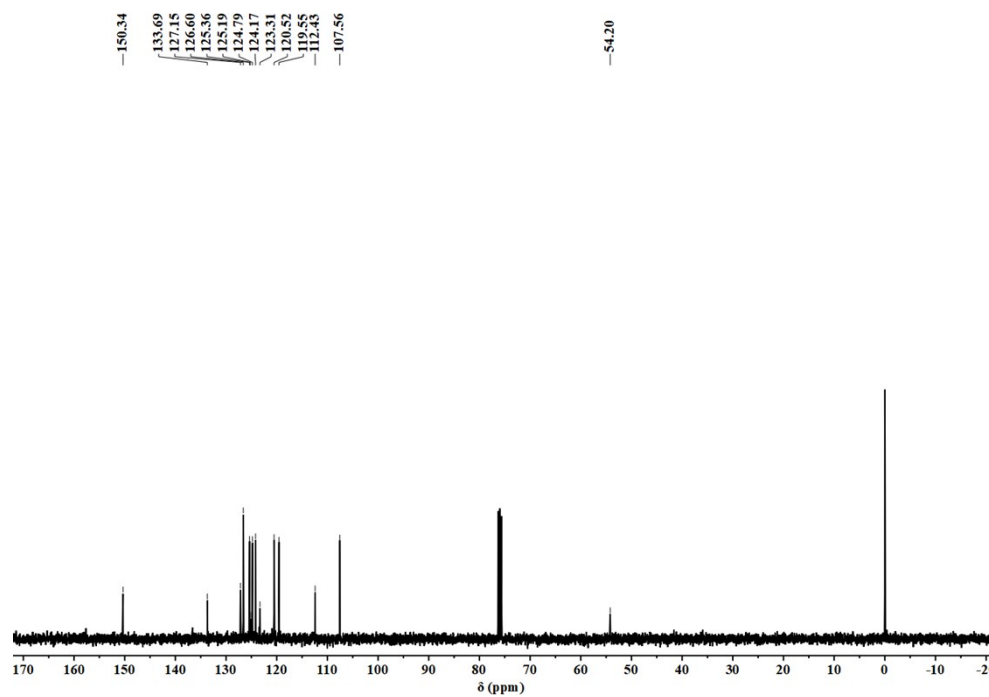

**Fig. S14** <sup>13</sup>C NMR spectrum (101 MHz, CDCl<sub>3</sub>, 298 K) of NP

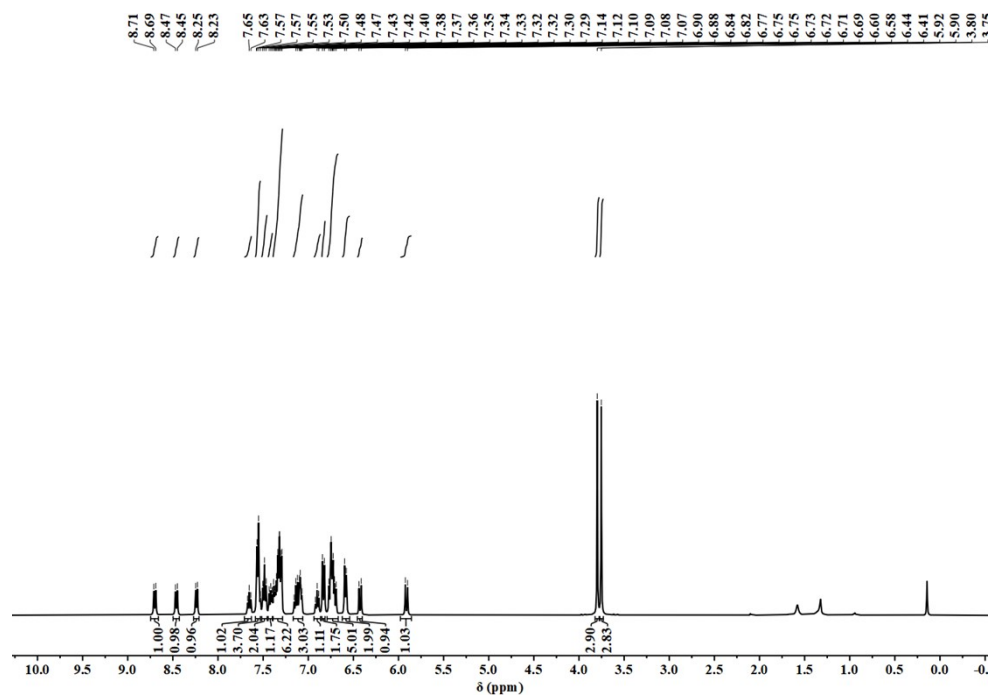

**Fig. S15**  $^1\text{H}$  NMR spectrum (400 MHz,  $\text{CDCl}_3$ , 298 K) of **NP-a**

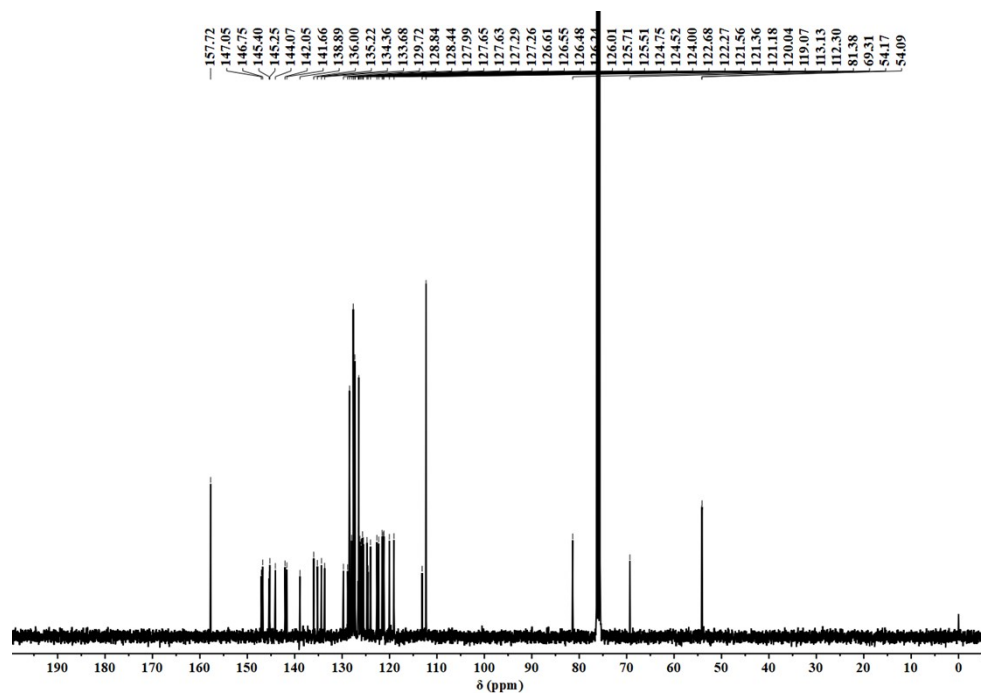

**Fig. S16**  $^{13}\text{C}$  NMR spectrum (101 MHz,  $\text{CDCl}_3$ , 298 K) of **NP-a**

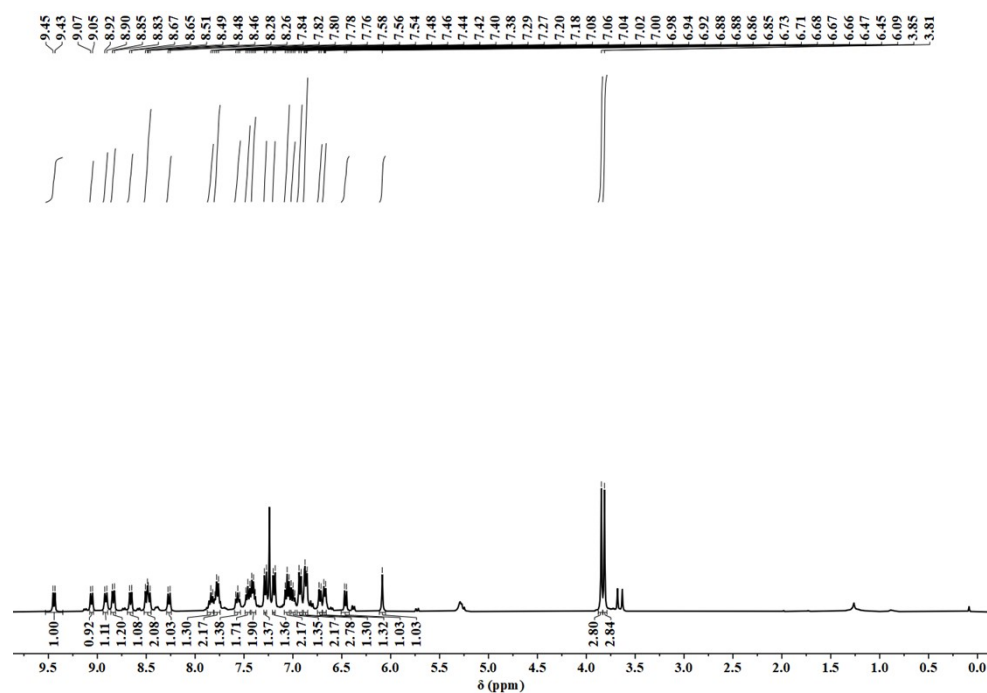

**Fig. S17**  $^1\text{H}$  NMR spectrum (400 MHz,  $\text{CDCl}_3$ , 298 K) of **NP-b**

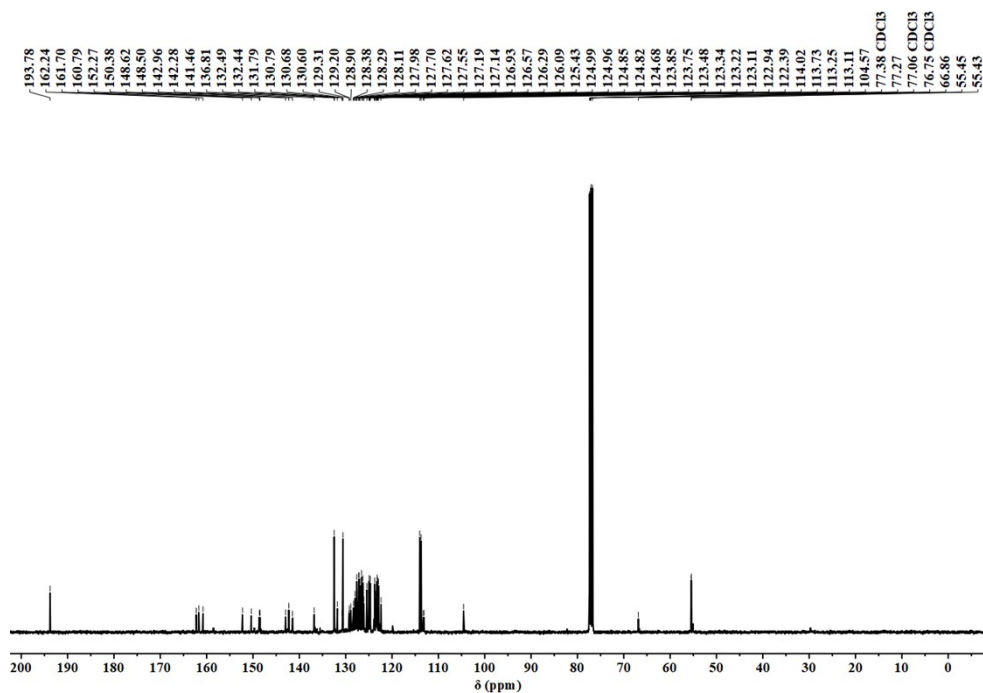

**Fig. S18**  $^{13}\text{C}$  NMR spectrum (101 MHz,  $\text{CDCl}_3$ , 298 K) of **NP-b**

### 3. MS Spectra

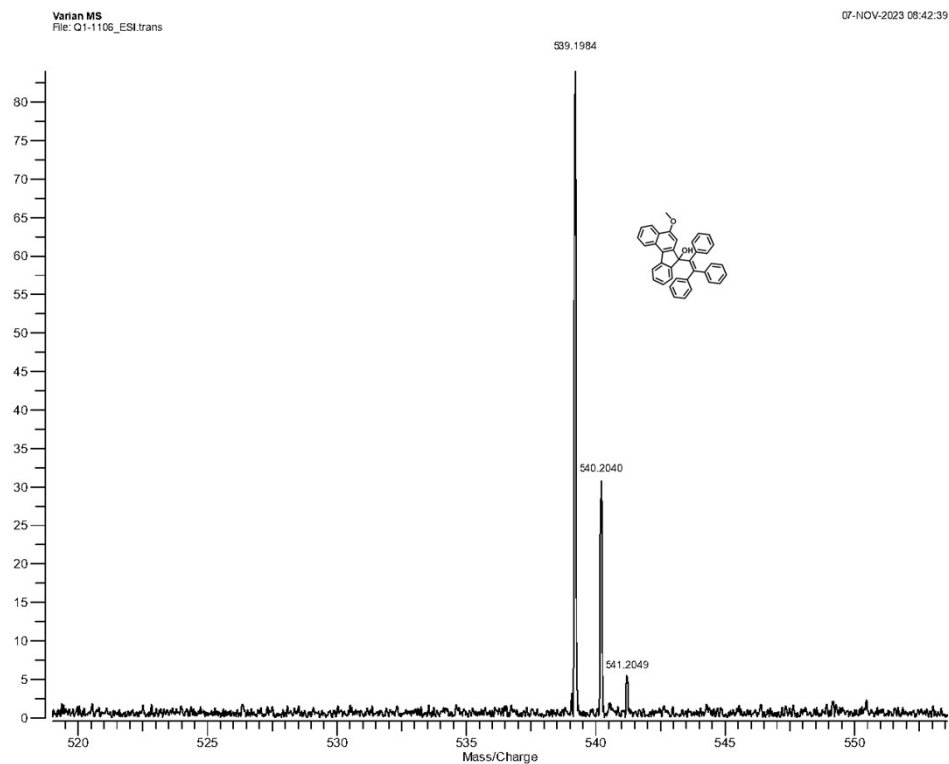

**Fig. S19** HR-ESI-TOF-MS of 5-methoxy-7-(1,2,2-triphenylvinyl)-7*H*-benzo[c]fluoren-7-ol

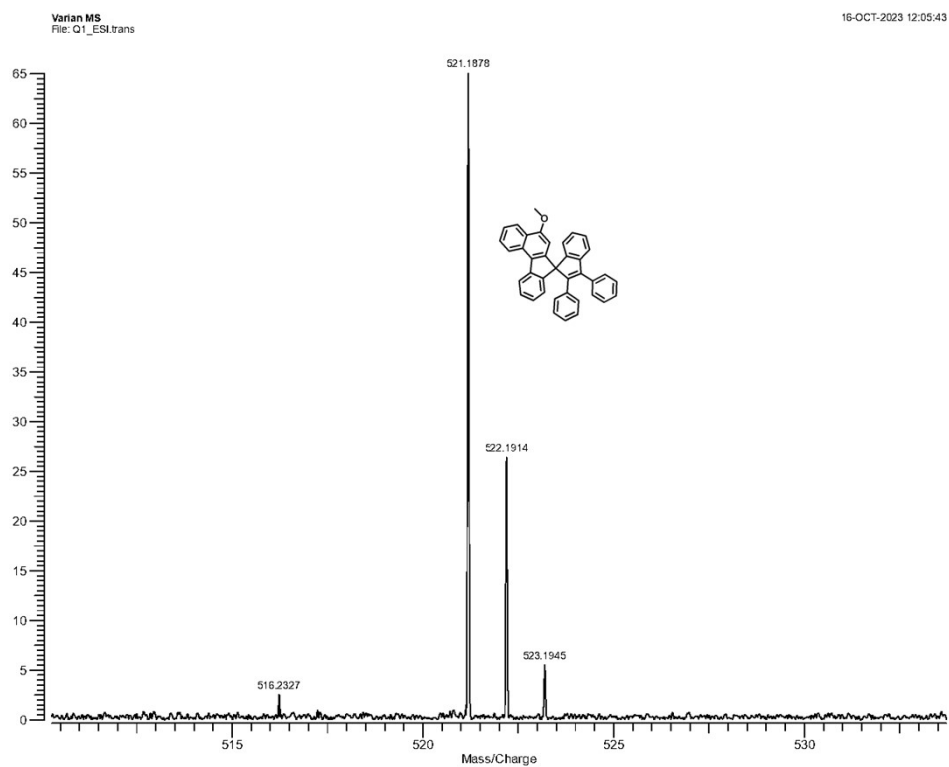

**Fig. S20** HR-ESI-TOF-MS of 5-methoxy-2',3'-diphenylspiro[benzo[c]fluorene-7,1'-indene]

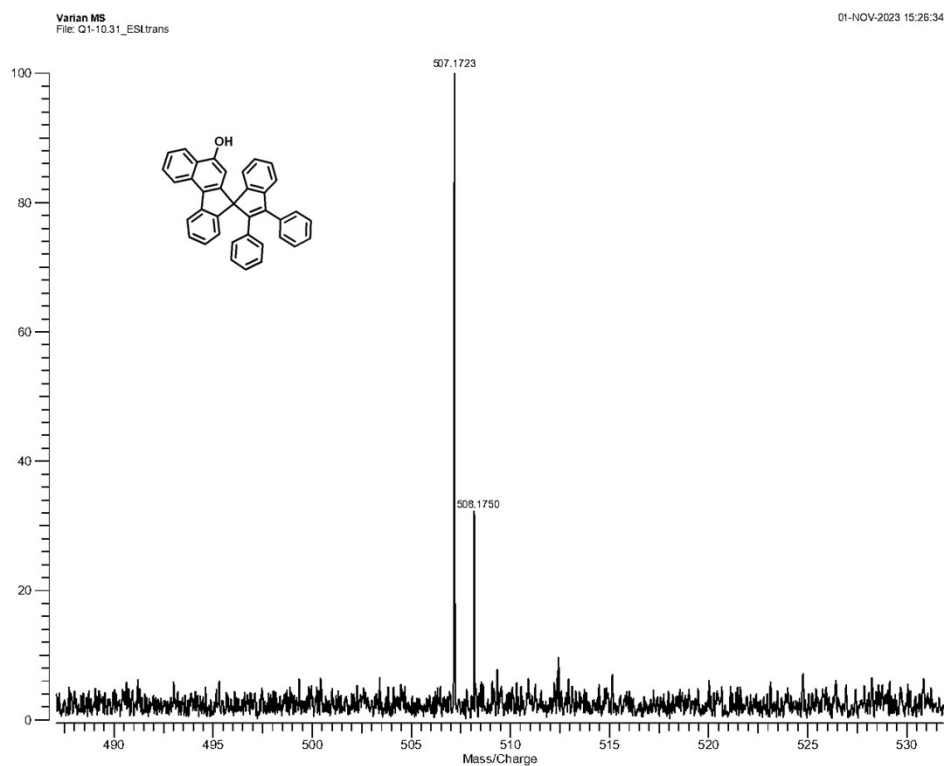

**Fig. S21** HR-ESI-TOF-MS of 2',3'-diphenylspiro[benzo[c]fluorene-7,1'-inden]-5-ol

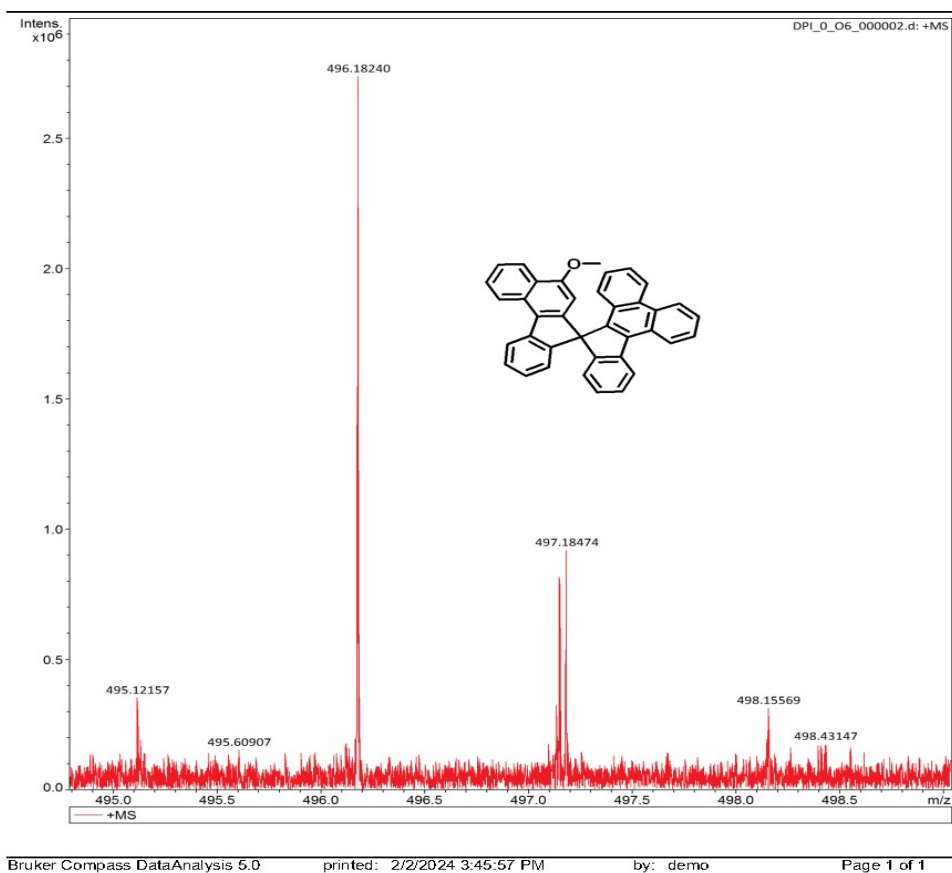

**Fig. S22** HR-ESI-TOF-MS of 5-methoxyspiro[benzo[c]fluorene-7,13'-indeno[1,2-l]phenanthrene]

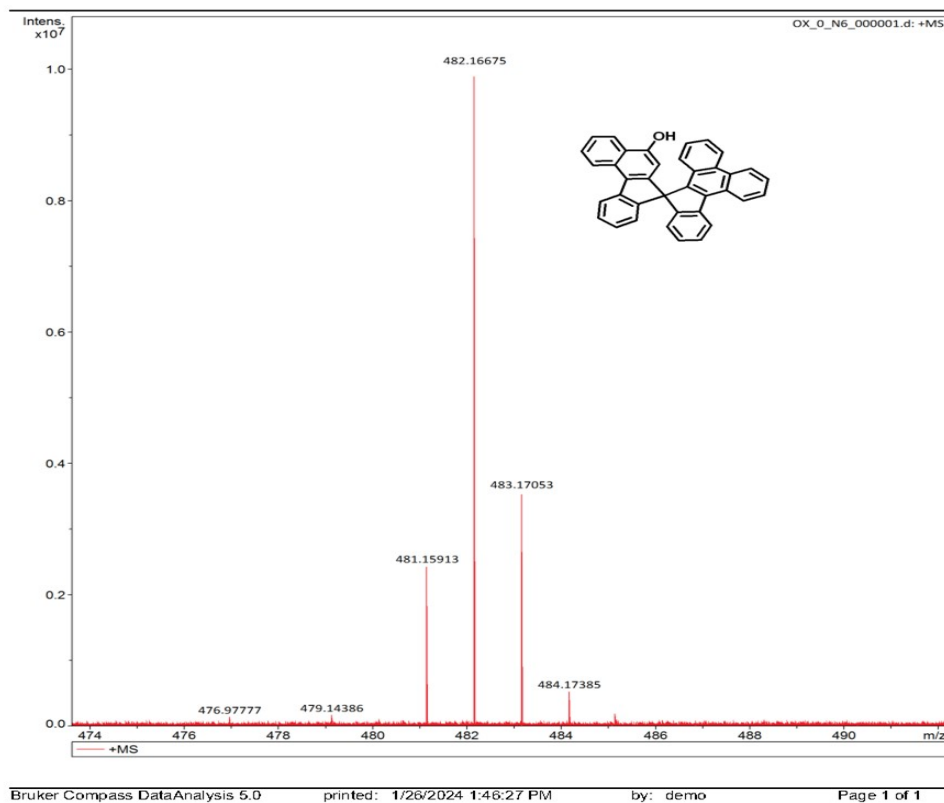

**Fig. S23** HR-ESI-TOF-MS of spiro[benzo[c]fluorene-7,13'-indeno[1,2-l]phenanthren]-5-ol

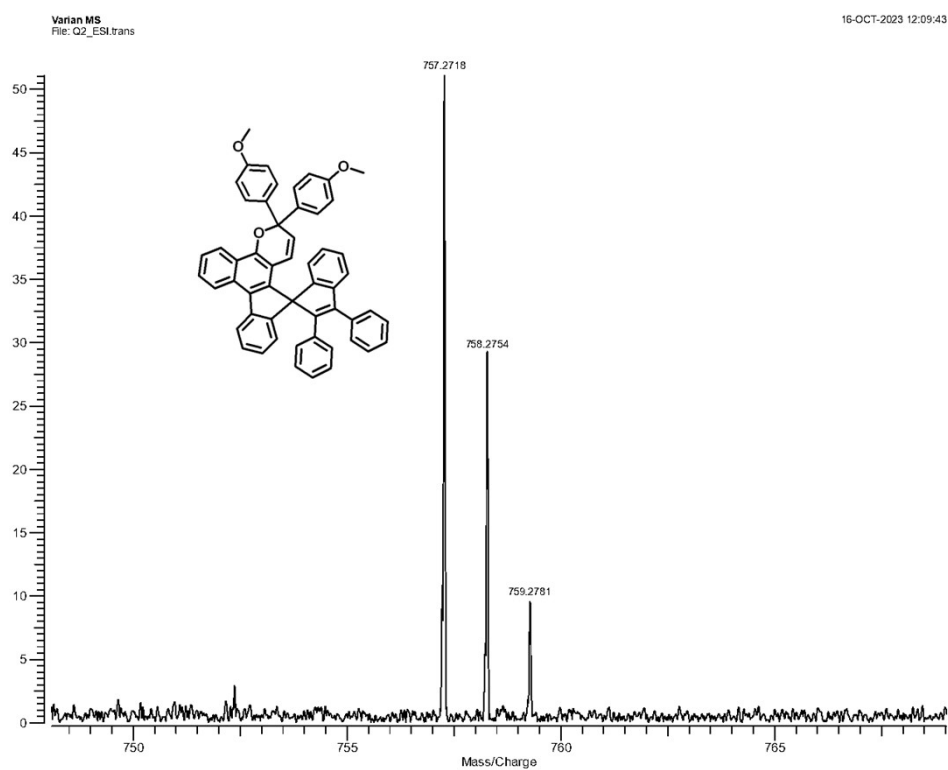

**Fig. S24** HR-ESI-TOF-MS of NP-a

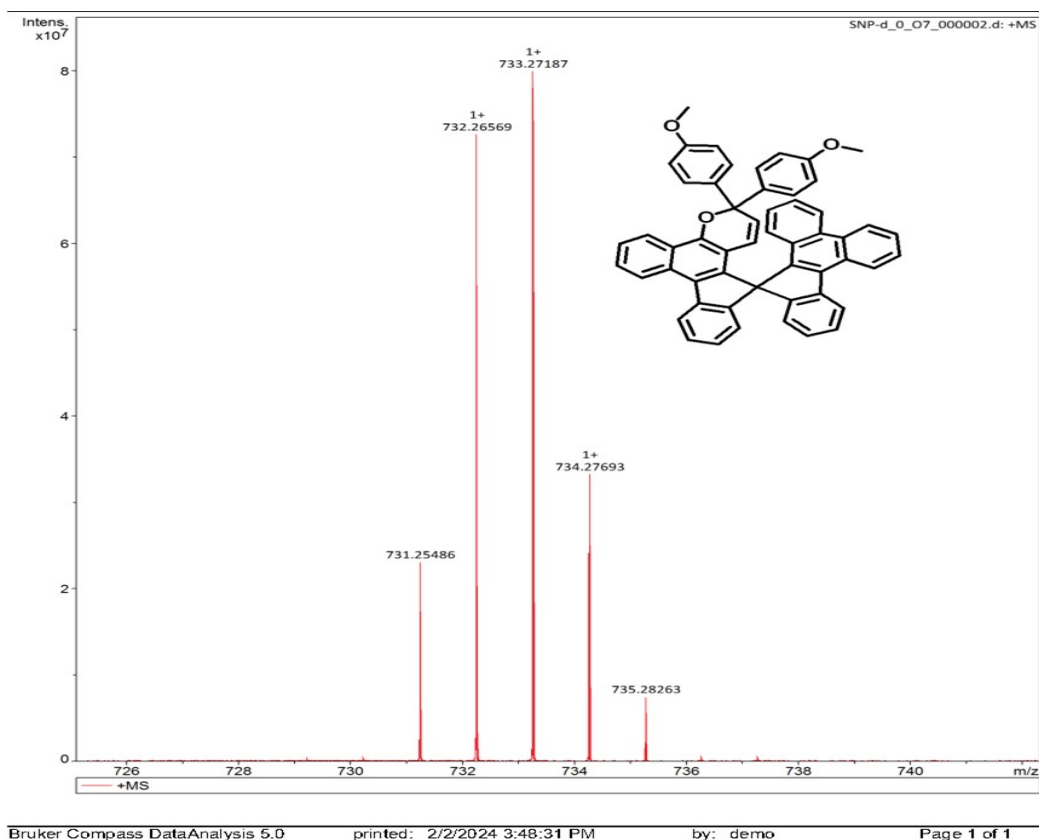

**Fig. S25** HR-ESI-TOF-MS of **NP-b**

#### 4. Optical Properties of NPs in the solution

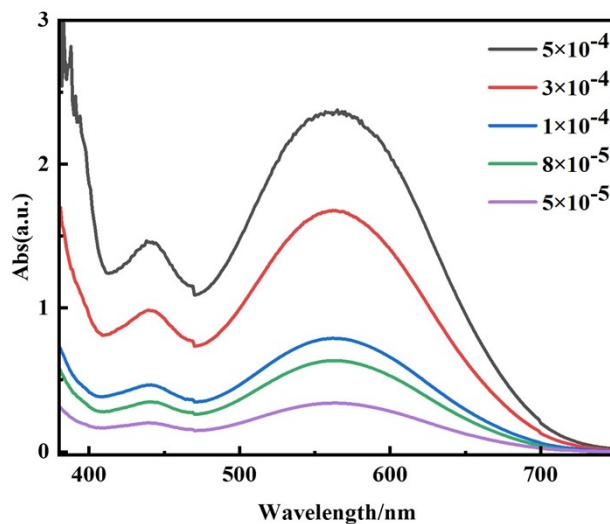

**Fig. S26** UV-Vis absorption spectra of **NP-a** in chloroform with various concentrations upon irradiation with UV light (365 nm, 200 mW) for 50 seconds

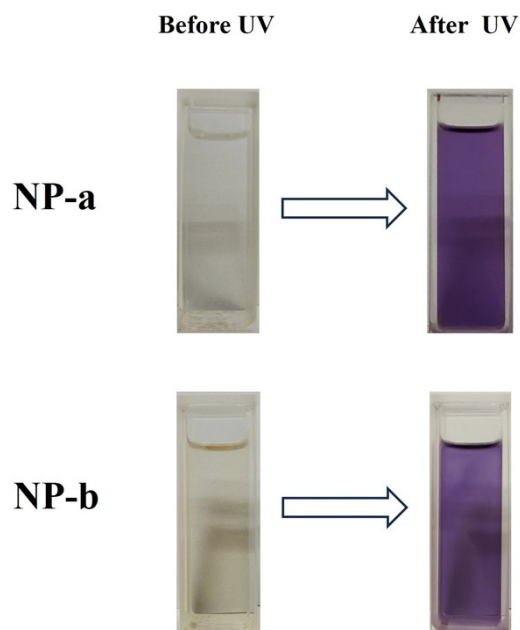

**Fig. S27** Color change of **NP-a** and **NP-b** in chloroform ( $8.0 \times 10^{-5}$  M) upon UV irradiation (365nm, 260mW /cm<sup>2</sup>) to PSS

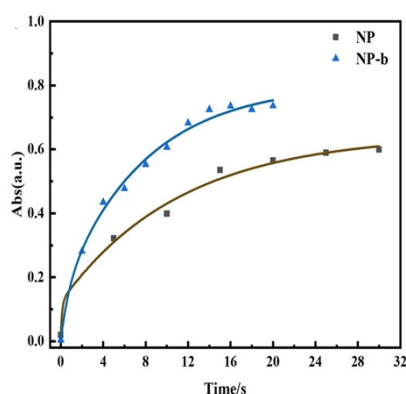

**Fig. S28** Photochromic curves over time at  $\lambda_{\max}$  of **NP-b** and **NP** in chloroform ( $8 \times 10^{-5}$  mol/L) upon UV irradiation(365nm, 260mW /cm<sup>2</sup>); (b) Thermal fading curves of **NP-a**, **NP-b** and **NP** in chloroform ( $8 \times 10^{-5}$  mol/L) at 298 K

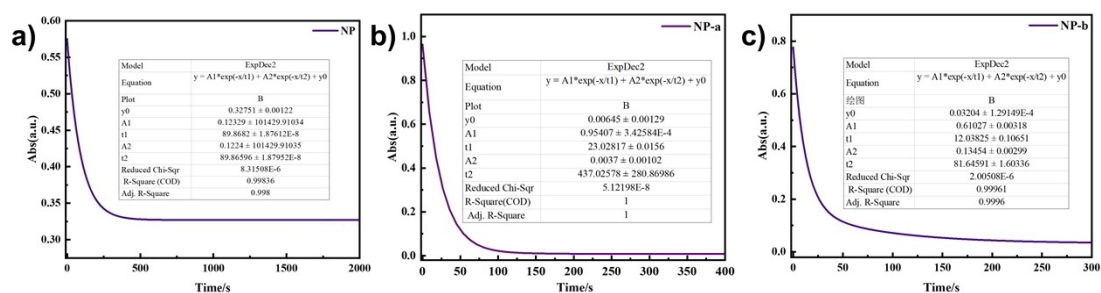

**Fig. S29** Thermal fading curves with kinetics parameters of (a) **NP-a**, (b) **NP-b** and (c) **NP** in chloroform ( $8 \times 10^{-5}$  mol/L) at 298 K

Table S1 Photophysical data of **NP-a** in various solvents ( $5 \times 10^{-5}$  mol/L) upon irradiation with UV light (365 nm, 200 mW) for 50 s

| Solvent    | $\lambda_{\max}$ (nm) | $A_{\max}$ | $\epsilon/\text{dm}^3\text{mol}^{-1}\text{cm}^{-1}$ |
|------------|-----------------------|------------|-----------------------------------------------------|
| Toluene    | 551                   | 0.1694     | $3.39 \times 10^3$                                  |
| Acetone    | 553                   | 0.2937     | $5.87 \times 10^3$                                  |
| MeCN       | 553                   | 0.2405     | $4.81 \times 10^3$                                  |
| Chloroform | 562                   | 0.4505     | $9.01 \times 10^3$                                  |
| THF        | 551                   | 0.3863     | $7.73 \times 10^3$                                  |

## 5. Optical Properties of PMMA Film Doped with NP-b

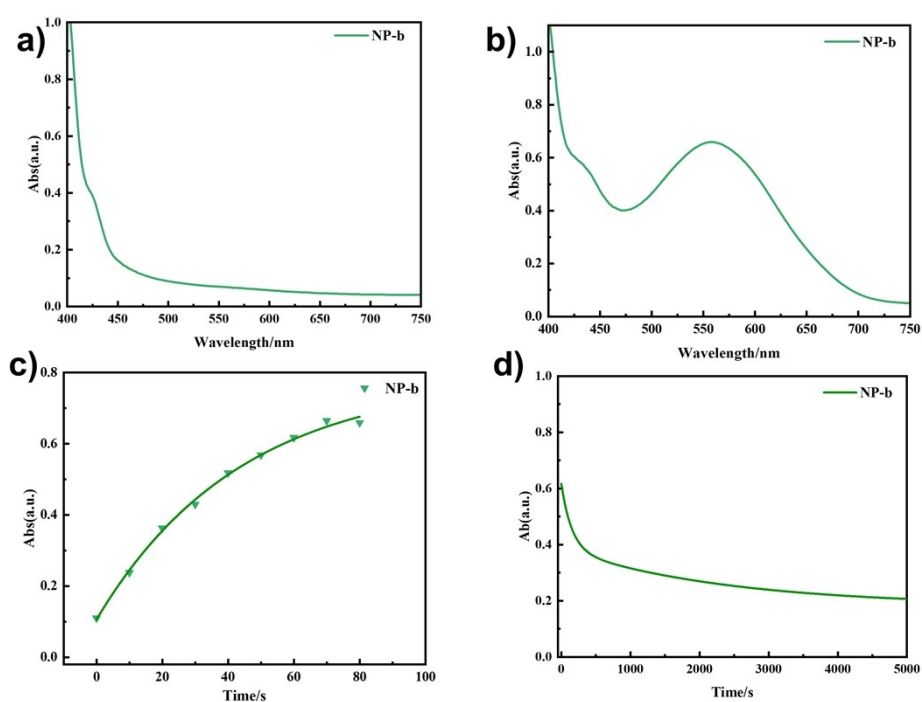

**Fig. S30** (a) UV-Vis absorption spectra of the PMMA doped with **NP-b** without UV irradiation; (b) UV-Vis absorption spectra of the PMMA doped with **NP-b** upon UV irradiation (365nm, 260mW /cm<sup>2</sup>) to PSS; (c) Photochromic curve over time at  $\lambda_{\max}$  of the PMMA doped with **NP-b**; (d) Thermal fading curve of the PMMA doped with **NP-b** at 298 K.

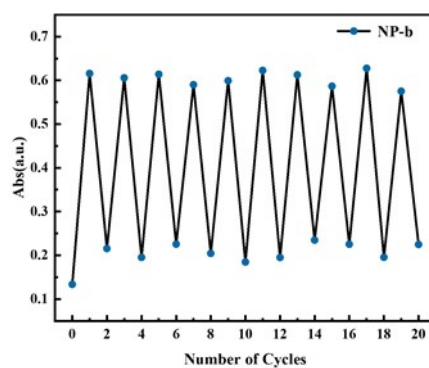

**Fig. S31** Absorbance values at  $\lambda_{\max}$  of the process of color generation and decoloration of the PMMA film doped with **NP-b** at room temperature

## 6. X-ray Crystallographic Analysis.

Single crystals of **NP-a** were grown by slowly diffusing *n*-hexane into the chloroform solution.

Table S2 X-ray crystal structure refinement data for **NP-a**.

| Identification code                            | <b>NP-a</b>                                                            |
|------------------------------------------------|------------------------------------------------------------------------|
| Empirical formula                              | C <sub>54</sub> H <sub>38</sub> O <sub>3</sub>                         |
| Formula weight                                 | 734.84                                                                 |
| Temperature/K                                  | 302(2)                                                                 |
| Crystal system                                 | triclinic                                                              |
| Space group                                    | P-1                                                                    |
| a/Å                                            | 11.6774(3)                                                             |
| b/Å                                            | 12.0992(3)                                                             |
| c/Å                                            | 14.8445(4)                                                             |
| $\alpha/^\circ$                                | 88.277(2)                                                              |
| $\beta/^\circ$                                 | 72.382(2)                                                              |
| $\gamma/^\circ$                                | 71.540(2)                                                              |
| Volume/Å <sup>3</sup>                          | 1891.08(9)                                                             |
| Z                                              | 2                                                                      |
| Pcalc g/cm <sup>3</sup>                        | 1.291                                                                  |
| $\mu$ /mm-1                                    | 0.613                                                                  |
| F(000)                                         | 772.0                                                                  |
| Radiation                                      | CuK $\alpha$ ( $\lambda$ = 1.54184)                                    |
| 2 $\theta$ range for data collection/ $^\circ$ | 7.724 to 153.356                                                       |
| Index ranges                                   | -14 $\leq$ h $\leq$ 14, -15 $\leq$ k $\leq$ 15, -18 $\leq$ l $\leq$ 15 |
| Reflections collected                          | 24115                                                                  |
| Independent reflections                        | 7655 [R <sub>int</sub> = 0.0264, R <sub>sigma</sub> = 0.0253]          |
| Data/restraints/parameters                     | 7655/0/517                                                             |
| Goodness-of-fit on F <sup>2</sup>              | 1.059                                                                  |
| Final R indexes [I $\geq$ 2 $\sigma$ (I)]      | R <sub>1</sub> = 0.0383, wR <sub>2</sub> = 0.1023                      |
| Final R indexes [all data]                     | R <sub>1</sub> = 0.0416, wR <sub>2</sub> = 0.1049                      |
| Largest diff. peak/hole / e Å <sup>-3</sup>    | 0.43/-0.28                                                             |

## 7. References

1. J. Momoda, S. Izumi and Y. Yokoyama, *Dyes Pigments*, 2015, **119**, 95–107.
2. M.-H. Kim, M. Saleem, J.-S. Seo, C.-S. Choi and K. H. Lee, *Spectrochim. Acta. A. Mol. Biomol. Spectrosc.*, 2015, **136**, 1291–1297.
